# Supplementary material
Source: MDPI journal article supplement (https://www.mdpi.com/2073-4395/13/4/1093)
Supplement: s1 [file s1 › agronomy-2282570-supplementary.pdf]

## Supplementary Information

Manuscript Title

### **Predicting long-term effects of alternative management practices in conventional and organic agricultural systems on soil carbon stocks using the DayCent model**

Caio Fernandes Zani<sup>1\*</sup>, Mohamed Abdalla<sup>2</sup>, Geoffrey Dennis Abbott<sup>1</sup>, James Arnold Taylor<sup>3</sup>, Marcelo Valadares Galdos<sup>4,5</sup>, Julia Mary Cooper<sup>1,6</sup>, Elisa Lopez-Capel<sup>1</sup>

<sup>1</sup>School of Natural and Environmental Sciences, Newcastle University, Newcastle upon Tyne, England, NE1 7RU, UK.

<sup>2</sup>Institute of Biological and Environmental Sciences, School of Biological Sciences, University of Aberdeen, Aberdeen, AB24 3UU, UK.

<sup>3</sup>ITAP, Université de Montpellier, Institut Agro, INRAE, Montpellier, 34000, France.

<sup>4</sup>Institute for Climate and Atmospheric Science, School of Earth and Environment, University of Leeds, Leeds, LS2 9JT, UK.

<sup>5</sup>Sustainable Soils and Crops, Rothamsted Research, Harpenden, AL5 2JQ, United Kingdom.

<sup>6</sup>Organic Research Centre, Trent Lodge, Cirencester GL7 6JN, United Kingdom.

**\* Correspondence:**

Caio Fernandes Zani  
caiofzani@gmail.com

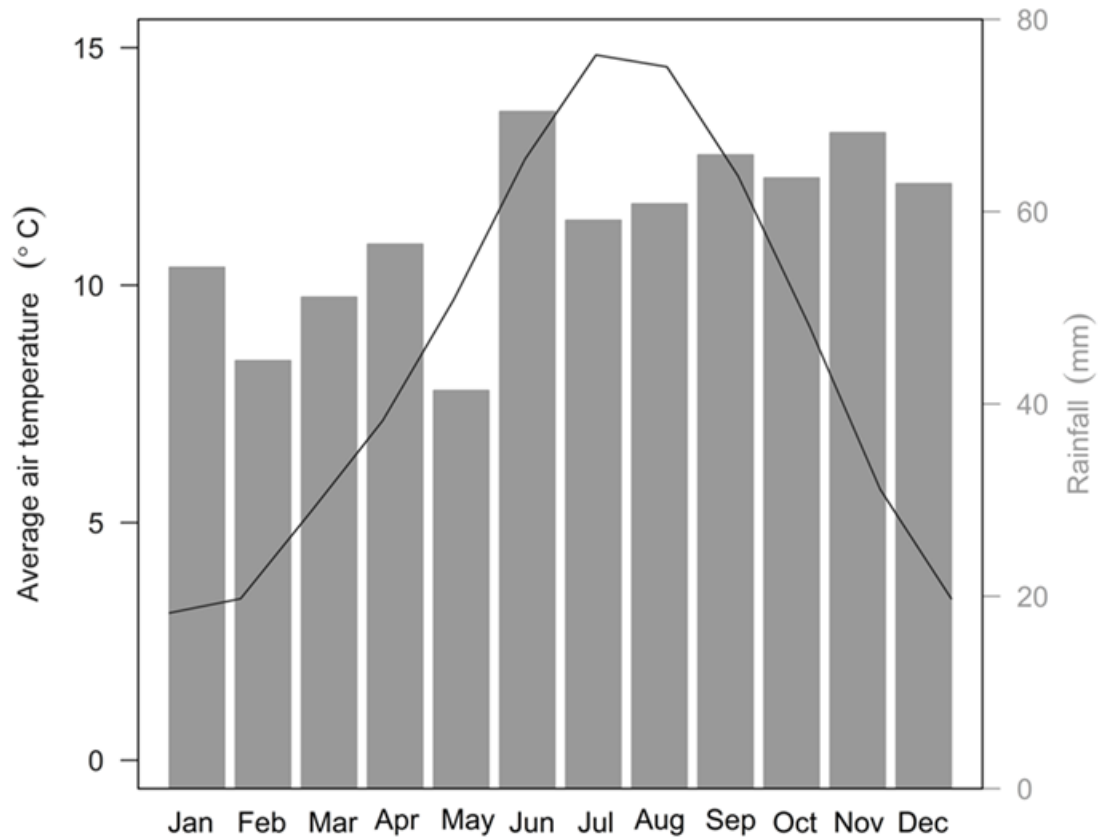

**Figure S1.** Average monthly air temperature (line) and rainfall (bars) at Nafferton farm, Stocksfield, Northumberland, Northeast England, UK, between 1900-2020.

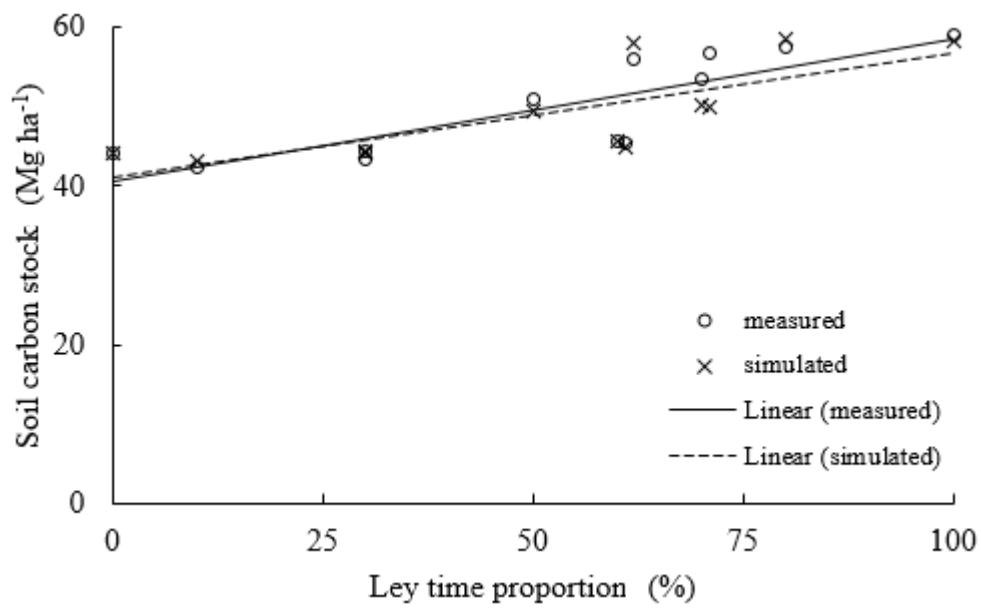

**Figure S2.** Relationship between measured and simulated soil organic C stocks (SOC stock, Mg ha<sup>-1</sup>) at 0-0.20 m depth due to changes in ley time proportions (%). Each (○) symbol represents a study site SOC stock mean of a minimum of eight and a maximum of 15 spatial replications. Each (x) symbol represents the simulated SOC stock of the study site. The solid line is the linear regression line around the measured values, while the dashed line is the linear regression line around the simulated values.

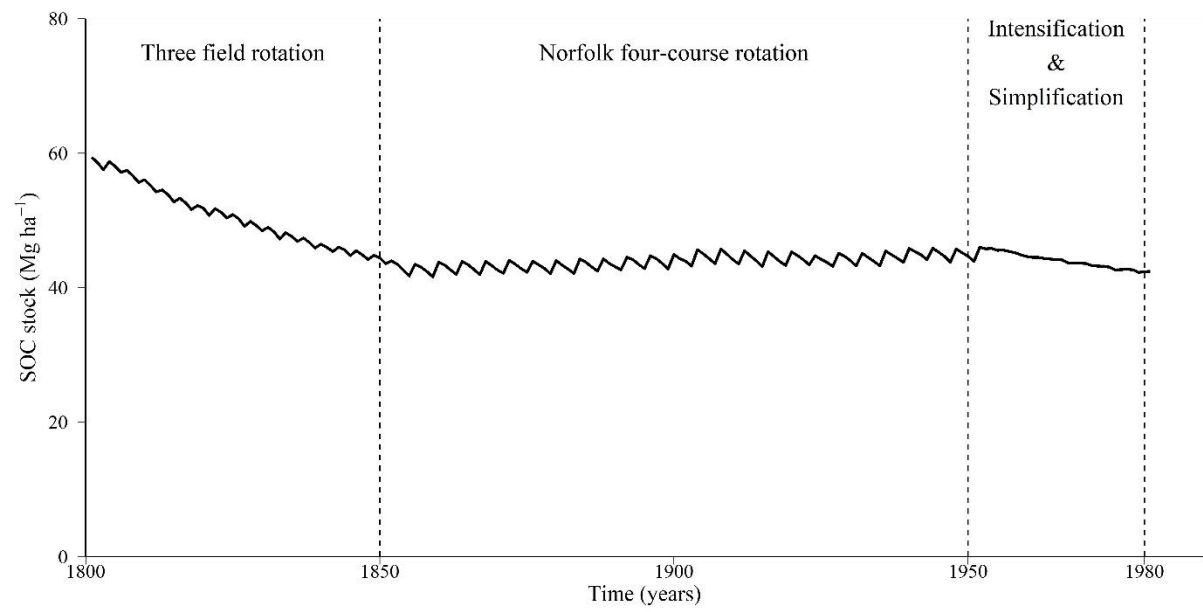

**Figure S3.** Equilibrium to modern-day baseline simulation of soil organic C stocks (SOC stocks,  $\text{Mg ha}^{-1}$ ) at 0-0.20 m depth.

**Table S1.** Management history of the 12 study fields at Nafferton Farm over 10 years (2008-2017) indicating agricultural system (S) (conventional-CONV and organic-ORG), grazing regime (G) (non-grazed-NG and grazed-GG), ley time proportion (LTP), manure application proportions (MAP), and tillage event proportion (TEP) and further details including main crops grown and fertilisation rates. LTP, MAP and TEP shown as % of years in which the field was under ley, received manure application or it had activities that turned the soil over for at least 0.15 m depth prior sampling. Data from Zani et al. (2022).

| Study Field n <sup>o</sup> | S    | G  | LTP % | MAP % | TEP* | 2008      | 2009      | 2010      | 2011      | 2012     | 2013      | 2014      | 2015      | 2016      | 2017      | Further details                                                                                                                                                                                                                                               |
|----------------------------|------|----|-------|-------|------|-----------|-----------|-----------|-----------|----------|-----------|-----------|-----------|-----------|-----------|---------------------------------------------------------------------------------------------------------------------------------------------------------------------------------------------------------------------------------------------------------------|
| 1                          | CONV | NG | 0     | 10    | 80   | W. Wheat  | W. Wheat  | W. Barley | W. Barley | W. OSR   | W. Wheat  | W. Wheat  | W. Barley | W. Barley | W. OSR    | Continuous arable rotation with annual fertilisation (mineral and organic forms) of roughly 89, 78 and 156 kg ha <sup>-1</sup> yr <sup>-1</sup> for N, P and K, respectively.                                                                                 |
| 2                          | CONV | NG | 10    | 10    | 50   | Ley       | W. Barley | W. OSR    | W. Wheat  | W. Wheat | S. Barley | W. Barley | W. OSR    | W. Wheat  | W. Wheat  | Previously cultivated with ley-arable rotation but became a continuous arable rotation for the last nine years. Annual fertilisation (mineral and organic forms) of roughly 69, 56 and 111 kg ha <sup>-1</sup> yr <sup>-1</sup> for N, P and K, respectively. |
| 3                          | CONV | GG | 70    | 60    | 30   | W. Wheat  | W. Wheat  | W. Barley | Ley       | Ley      | Ley       | Ley       | Ley       | Ley       | Ley       | Ley-arable rotation with annual fertilisation (mineral and organic forms) of roughly 148, 46 and 93 kg ha <sup>-1</sup> yr <sup>-1</sup> for N, P and K, respectively.                                                                                        |
| 4                          | CONV | GG | 50    | 40    | 40   | W. Barley | Ley       | Ley       | Ley       | Ley      | Ley       | S. Barley | W. Wheat  | S. Barley | S. Barley | Ley-arable rotation with annual fertilisation (mineral and organic forms) of roughly 89, 31 and 43 kg ha <sup>-1</sup> yr <sup>-1</sup> for N, P and K, respectively.                                                                                         |
| 5                          | CONV | GG | 100   | 50    | 0    | Ley       | Ley       | Ley       | Ley       | Ley      | Ley       | Ley       | Ley       | Ley       | Ley       | Ley-arable rotation field but under ley for the last ten years. Annual fertilisation (mineral and organic forms) of roughly 130, 28 and 57 kg ha <sup>-1</sup> yr <sup>-1</sup> for N, P and K, respectively.                                                 |
| 6                          | CONV | GG | 60    | 40    | 30   | Ley       | Ley       | Ley       | W. Wheat  | W. Wheat | W. Barley | Ley       | Ley       | Ley       | Ley       | Ley-arable rotation with annual fertilisation (mineral and organic forms) of roughly 190, 79 and 140 kg ha <sup>-1</sup> yr <sup>-1</sup> for N, P and K, respectively.                                                                                       |
| 7                          | ORG  | GG | 80    | 60    | 20   | Ley       | S. Wheat  | S. Barley | Ley       | Ley      | Ley       | Ley       | Ley       | Ley       | Ley       | Ley-arable rotation with nnual fertilisation (only organic forms) of roughly 48, 52 and 141 kg ha <sup>-1</sup> yr <sup>-1</sup> for N, P and K, respectively.                                                                                                |

|    |     |    |    |    |    |              |              |     |             |                |                |                |                |                |                |                                                                                                                                                                 |
|----|-----|----|----|----|----|--------------|--------------|-----|-------------|----------------|----------------|----------------|----------------|----------------|----------------|-----------------------------------------------------------------------------------------------------------------------------------------------------------------|
| 8  | ORG | GG | 60 | 70 | 40 | S.<br>Beans  | Ley          | Ley | S.<br>Wheat | Beans<br>Dried | S.<br>Barley   | Ley            | Ley            | Ley            | Ley            | Ley-arable rotation with annual fertilisation (only organic forms) of roughly 59, 61 and 150 kg ha <sup>-1</sup> yr <sup>-1</sup> for N, P and K, respectively. |
| 9  | ORG | GG | 60 | 20 | 30 | S.<br>Barley | Potato<br>s  | Ley | Ley         | Ley            | Beans<br>Dried | S.<br>Barley   | Ley            | Ley            | Ley            | Ley-arable rotation with annual fertilisation (only organic forms) of roughly 59, 65 and 170 kg ha <sup>-1</sup> yr <sup>-1</sup> for N, P and K, respectively. |
| 10 | ORG | NG | 30 | 70 | 70 | S.<br>Wheat  | S.<br>Barley | Ley | Ley         | Ley            | S.<br>Wheat    | Beans<br>Dried | S.<br>Barley   | Beans<br>Dried | Beans<br>Dried | Ley-arable rotation with annual fertilisation (only organic forms) of roughly 67, 74 and 200 kg ha <sup>-1</sup> yr <sup>-1</sup> for N, P and K, respectively. |
| 11 | ORG | NG | 30 | 60 | 50 | S.<br>Barley | Ley          | Ley | Ley         | S.<br>Wheat    | Beans<br>Dried | S.<br>Wheat    | Beans<br>Dried | S.<br>Barley   | S.<br>Barley   | Ley-arable rotation with annual fertilisation (only organic forms) of roughly 71, 79 and 200 kg ha <sup>-1</sup> yr <sup>-1</sup> for N, P and K, respectively. |
| 12 | ORG | GG | 70 | 40 | 30 | Ley          | Ley          | Ley | Ley         | Ley            | Ley            | S.<br>Barley   | Beans<br>Dried | S.<br>Barley   | Ley            | Ley-arable rotation with annual fertilisation (only organic forms) of roughly 65, 46 and 96 kg ha <sup>-1</sup> yr <sup>-1</sup> for N, P and K, respectively.  |

---

\*Since conversion from conventional to the organic system across 50% of the farm area (i.e. from 2001 onwards), tillage practice was conducted using ploughing and disking practices to a maximum depth of 0.15 m at both sides of the farm.

**Table S2.** Summary of the input parameters entered in the DayCent model including climate data and general soil properties (0-0.20 m depth) encompassing the farm-scale study and the Nafferton Factorial Systems Comparison (NFSC) trial.

| Input parameters                                   | Unit                 | Value      |
|----------------------------------------------------|----------------------|------------|
| <i>Climate data</i> <sup>a</sup>                   |                      |            |
| Latitude (only used as information, not an input)  | degree               | 54.9857 N  |
| Longitude (only used as information, not an input) | degree               | 1.8990 W   |
| Yearly maximum of average daily temperature        | °C                   | 12.1       |
| Yearly minimum of average daily temperature        | °C                   | 4.7        |
| Yearly maximum accumulated precipitation           | mm                   | 1048       |
| Atmospheric CO <sub>2</sub> concentrations         | ppm                  | 418        |
| <i>Soil properties</i> <sup>b</sup>                |                      |            |
| Soil texture (sand, silt, clay)                    | %                    | 40, 43, 17 |
| Bulk density                                       | Mg m <sup>-3</sup>   | 1.15       |
| pH (H <sub>2</sub> O)                              | -                    | 6.3        |
| Field capacity                                     | %                    | 28.09      |
| Wilting point                                      | %                    | 10.64      |
| Hydraulic conductivity                             | cm sec <sup>-1</sup> | 0.001      |
| Initial total carbon stock <sup>c</sup>            | Mg ha <sup>-1</sup>  | 60         |

<sup>a</sup> Taken from a combination of the MetOffice database and site-specific inputs.

<sup>b</sup> Average of the measured/estimated site-specific features considering all the study fields in the farm-scale study (Zani et al., 2022; sampled in 2017) and the treatments in the NFSC trial (Zani et al., 2023 *under review*; sampled in 2018).

<sup>c</sup> Based on published data for the arable system for the whole UK (Tipping et al., 2012, 2017; Davies et al., 2016; Muhammed et al., 2018)
